# Supplementary material
Source: PubMed Central journal article supplement (PMC2577778)

# Features of heavy chain CDR3s

□ DNA+    ■ DNA-

**Length(bps)**

**Positively charged amino acid (R,K,H) number**

**M55**  
(N=17;35)

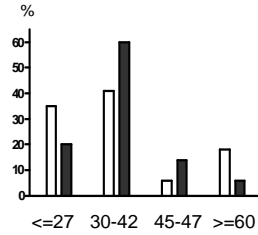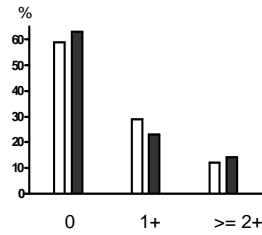

**C9**  
(N=11;34)

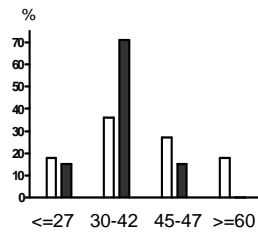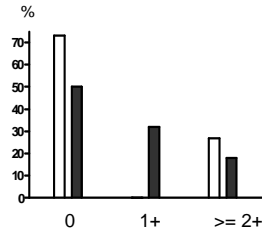

**C15**  
(N=19;20)

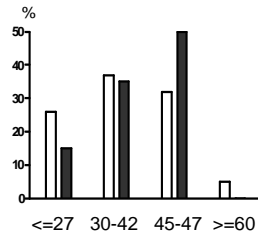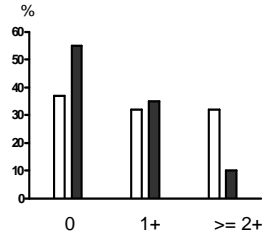

Supplement: NIHMS71143-supplement-02.pdf [file NIHMS71143-supplement-02.pdf]
