# Supplementary material
Source: PubMed Central journal article supplement (PMC2577778)
Supplement: NIHMS71143-supplement-03.pdf [file NIHMS71143-supplement-03.pdf]

Table S1(A) Repertoire and reactivity of antibodies from IgM+Tetramer+ B cells of M55

| Ig     | Heavy     |                     |        |                |                                                |             | Light      |        |                |                          |             | Reactivity # |        |
|--------|-----------|---------------------|--------|----------------|------------------------------------------------|-------------|------------|--------|----------------|--------------------------|-------------|--------------|--------|
|        | V         | D                   | J      | mutation (bp)* | CDR3(aa)                                       | length (bp) | V          | J      | mutation (bp)* | CDR3(aa)                 | length (bp) | pep          | ds-DNA |
| A9     | VH1-69*01 | D6-13*01            | JH4*02 | 6              | A R L A A A G N S                              | 27          | VK3-20*01  | JK2*02 | 4              | Q Q Y G S S P R T        | 27          | Y            | Y      |
| A8     | VH4-61*02 | D3-10*01            | JH6*03 | 0              | A R A G G S G S Y Q G<br>Y Y Y Y Y M D V       | 57          | VK3-20*01  | JK2*01 | 0              | Q Q Y G S S P R M<br>Y T | 33          | Y            | Y      |
| D5     | VH4-61*02 | DIR1*01             | JH4*02 | 0              | A R A P L P G P I D Y                          | 33          | VK4-1*01   | JK1*01 | 1              | Q Q Y Y S T S W T        | 27          | Y            | Y      |
| G3     | VH3-30*02 | D3-3*01             | JH6*03 | 5              | A K V G S Y Y D F W S<br>G Y R D Y Y Y M D V   | 66          | VK1-5*03   | JK1*01 | 2              | Q Q Y N S F W T          | 24          | Y            | Y      |
| B5     | VH3-07*01 | D3-10*01            | JH4*02 | 4              | A R D G T L L W F G A<br>S L D                 | 42          | VK1-NL1*01 | JK1*01 | 2              | Q Q Y Y T T P R T        | 27          | Y            | Y      |
| B7     | VH4-34*01 | D2-2*02             | JH6*03 | 2              | A K S R G G G G Y C S<br>S T S C Y K R G Y Y Y | 81          | VK3-20*01  | JK1*01 | 2              | Q Q Y G S S L S T<br>W T | 33          | Y            | Y      |
| A7     | VH1-02*02 | D6-19*01            | JH4*02 | 0              | A R I A V A D H G D Y                          | 33          | VL2-14*04  | JL2*01 | 0              | C S Y A G S S T Y<br>V V | 33          | Y            | Y      |
| D10    | VH4-61*02 | D2-21*01 or<br>*02  | JH3*02 | 2              | A R D G G R D A F D I                          | 33          | VL2-23*02  | JL2*01 | 0              | C S Y A G S S T L        | 27          | Y            | Y      |
| B4     | VH4-59*01 | D5-5*01/5-<br>18*01 | JH6*03 | 3              | A R V A P G G Y Y Y Y<br>Y Y M D V             | 48          | VL2-14*04  | JL3*02 | 0              | C S Y A G S S I W<br>V   | 30          | Y            | Y      |
| B12    | VH4-59*01 | D1-7*01             | JH4*02 | 15             | A R G T T I G L D Y F G<br>Y                   | 39          | VL2-11*01  | JL2*01 | 2              | C S Y A G Y Y S V<br>V   | 30          | Y            | Y      |
| A12    | VH4-04*07 | D6-19*01            | JH4*02 | 0              | A R D W Q W L G F D Y                          | 33          | VK1-9*01   | JK2*01 | 1              | Q Q L N S Y P V P        | 27          | N            | Y      |
| D11    | VH1-08*01 | D4-23*01            | JH3*02 | 2              | A R G Y G G N Y A L A<br>F D I                 | 42          | VL2-14*01  | JL2*01 | 0              | S S Y I S S S I N<br>V V | 33          | N            | Y      |
| C6     | VH5-51*01 | D5-24*01            | JH4*02 | 2              | A R R D G Y N L D Y                            | 30          | VK3-15*01  | JK4*01 | 3              | Q Q Y N D W P P L<br>T   | 30          | Y            | N      |
| F9     | VH1-69*01 | D2-08*01            | JH6*03 | 2              | A R G V D Y Y Y Y M<br>D V                     | 39          | VK3-20*01  | JK2*01 | 0              | Q Q Y G S S P N T        | 27          | Y            | N      |
| G8 (2) | VH4-61*02 | DIR1*01R            | JH4*02 | 0              | A R A P L P G S I D Y                          | 33          | VK3-15*01  | JK1*01 | 1              | Q Q Y N N W P R T        | 27          | Y            | N      |
| B11    | VH4-34*01 | D2-21*01            | JH4*02 | 3              | A R G A T G S S I Y C<br>G G D C Y Y L D Y     | 60          | VK3-11*01  | JK2*01 | 2              | Q Q R S N W Y T          | 24          | Y            | N      |

| Ig     | Heavy     |                        |        |                |                                                    |             | Light     |        |                |                              |             |     | Reactivity # |  |
|--------|-----------|------------------------|--------|----------------|----------------------------------------------------|-------------|-----------|--------|----------------|------------------------------|-------------|-----|--------------|--|
|        | V         | D                      | J      | mutation (bp)* | CDR3(aa)                                           | length (bp) | V         | J      | mutation (bp)* | CDR3(aa)                     | length (bp) | pep | ds-DNA       |  |
| F7     | VH4-61*02 | D3-9*01                | JH4*02 | 1              | A R G T G T F D W                                  | 27          | VL2-23*02 | JL3*02 | 0              | C S Y A G S S I F<br>V W V   | 36          | Y   | N            |  |
| H5     | VH4-59*01 | D6-19*01               | JH4*02 | 1              | A R S G S G W Y V Y F<br>D Y                       | 39          | VK3-15*01 | JK4*01 | 1              | Q Q Y N N W P L T            | 27          | N   | N            |  |
| E2     | VH3-09*01 | D3-10*01               | JH4*02 | 0              | A K D I G Y Y G S G S L<br>S L                     | 42          | VK3-15*01 | JK1*01 | 4 <sup>§</sup> | Q H Y N N W S Q T            | 27          | N   | N            |  |
| E7     | VH3-30*02 | D6-6*01<br>(+DIR2*01R) | JH4*02 | 16             | A K G S G V E S S S S<br>G L C D Y                 | 48          | VK4-1*01  | JK2*01 | 1              | Q Q Y Y T T P Y T            | 27          | N   | N            |  |
| G2     | VH3-23*01 | D2-2*02                | JH4*02 | 1              | A K G S R H Y C S S I<br>S C Y N D Y               | 51          | VK1-27*01 | JK4*01 | 1              | Q K Y N S A P P V<br>T       | 30          | N   | N            |  |
| D8     | VH3-74*01 | D6-19*01               | JH5*02 | 1              | A R V A P S S G W S F<br>D P                       | 39          | VK1-39*01 | JK3*01 | 0              | Q Q S Y S I P G F<br>T       | 30          | N   | N            |  |
| G8 (1) | VH1-46*03 | D3-3*01                | JH4*03 | 0              | A R A Q N F G V G S L<br>T T G Y F D Y             | 54          | VK3-15*01 | JK1*01 | 1              | Q Q Y N N W P R T            | 27          | N   | N            |  |
| C11    | VH3-21*01 | D3-10*01               | JH5*02 | 0              | A R V S P A A M S I Y<br>Y Y G S G S Y R G N W     | 75          | VK1-39*01 | JK3*01 | 0              | Q Q S Y S T L F T            | 27          | N   | N            |  |
| H6     | VH1-02*02 | D6-19*01               | JH4*02 | 0              | A R I A V A D H G D Y                              | 33          | VK1-39*01 | JK2*01 | 5              | Q Q S Y S I P L Y<br>T       | 30          | N   | N            |  |
| F8     | VH1-46*01 | D1-26*01               | JH3*02 | 0              | A R A V G A R H A F D I<br>A R D I R Y S G S P R I | 36          | VK3-20*01 | JK1*01 | 0              | Q Q Y G S S P R T            | 27          | N   | N            |  |
| B9     | VH4-04*07 | D1-26*01               | JH6*03 | 10             | L Y Y Y M D V                                      | 57          | VK4-1*01  | JK4*01 | 5              | Q Q Y Y S I P T              | 24          | N   | N            |  |
| B8     | VH3-15*01 | D7-27*1                | JH4*02 | 0              | T T E T A A F D Y                                  | 27          | VL1-44*01 | JL3*02 | 0              | A A W D D S L N G<br>W V     | 33          | N   | N            |  |
| C1     | VH3-09*01 | D3-10*01               | JH6*02 | 0              | A K D I G Y Y G S G S L<br>S L                     | 42          | VL2-23*02 | JL3*02 | 0              | C S Y A G S S I F<br>G V     | 33          | N   | N            |  |
| C5     | VH3-74*01 | D5-5or<br>18*01        | JH4*02 | 0              | A R E P A I Y F D Y                                | 30          | VL3-21*02 | JL2*01 | 0              | Q V W D S S S D H<br>P G V V | 39          | N   | N            |  |

Table S1(B) Repertoire and reactivity of antibodies from IgM+Tetramer- B cells of M55

| Ig    | Heavy     |          |        |                |                                                  |             | Light     |        |                |                              |             |     | Reactivity # |  |
|-------|-----------|----------|--------|----------------|--------------------------------------------------|-------------|-----------|--------|----------------|------------------------------|-------------|-----|--------------|--|
|       | V         | D        | J      | mutation (bp)* | CDR3(aa)                                         | length (bp) | V         | J      | mutation (bp)* | CDR3(aa)                     | length (bp) | pep | ds-DNA       |  |
| F1E1  | VH4-59*01 | D6-19*01 | JH4*02 | 5              | A R G S G W Y F Y                                | 27          | VK1-39*01 | JK3*01 | 16             | Q Q S Y D T P L T            | 27          | Y   | Y            |  |
| F2H1  | VH4-04*07 | D3-3*01  | JH2*01 | 9              | A R S P P D F W S G F<br>W Y F D L               | 48          | VL2-11*01 | JL2*01 | 5              | C S Y A G S Y V V            | 27          | Y   | Y            |  |
| F2C10 | VH1-08*01 | D2-2*01  | JH6*03 | 4              | A R G V V R R A R G T V<br>V V P V G M N Y Y M D | 72          | VL1-51*01 | JL3*02 | 2              | G T W D S R L S A<br>G P W V | 39          | Y   | Y            |  |
| F2G3  | VH4-34*01 | D6-13*01 | JH4*02 | 0              | A R V G Q L D P R S Y<br>F D Y                   | 42          | VL2-14*01 | JL2*01 | 1              | S S Y T S S S T V<br>V       | 30          | Y   | Y            |  |
| F2G11 | VH3-23*01 | D1-26*01 | JH3*01 | 21             | A R D R F S G N Y Y G<br>Q A F D L               | 48          | VK1-5*03  | JK2*01 | 12             | Q Q Y N G Y P M Y<br>T       | 30          | N   | Y            |  |
| F2E11 | VH3-07*01 | D6-13*01 | JH1*01 | 0              | A R G G S S W F P P A<br>H F Q H                 | 45          | VK1-5*03  | JK4*01 | 1              | Q Q Y N S Y R A L<br>T       | 30          | Y   | N            |  |
| F2A11 | VH4-34*01 | D5-5*01  | JH2*01 | 3              | A R N H H G F G I Y S Y<br>G Y G W Y F D L       | 60          | VL2-23*02 | JL1*01 | 3              | C S Y A G S S T L<br>N V     | 33          | Y   | N            |  |
| F1B4  | VH3-49*03 | D3-22*01 | JH4*02 | 15             | A H D T S G Y S Y S F<br>D Y                     | 39          | VK4-1*01  | JK2*01 | 5              | Q Q Y Y S I P Y T            | 27          | N   | N            |  |
| F1D8  | VH4-34*01 | D5-5*01  | JH5*01 | 15             | A R N L I G Y G N I I D<br>S                     | 39          | VK1-16*01 | JK2*01 | 10             | Q Q Y D S Y P Y T            | 27          | N   | N            |  |
| F1D12 | VH3-53*01 | D1-26*01 | JH4*02 | 1              | A R V V G A I N D Y F<br>D Y                     | 39          | VK3-11*01 | JK2*01 | 0              | Q Q R S N W P P G<br>Y T     | 33          | N   | N            |  |
| F1E4  | VH4-61*02 | D1-26*01 | JH4*02 | 0              | A R G A V G A I M D D<br>Y                       | 36          | VK3-11*01 | JK3*01 | 0              | Q Q R S N W P P F<br>T       | 30          | N   | N            |  |
| F1E6  | VH1-46*01 | D3-22*01 | JH4*02 | 0              | A R A W L G G G S G Y<br>Y F D Y                 | 45          | VK1-39*01 | JK2*01 | 0              | Q Q S Y S T P P Y<br>T       | 30          | N   | N            |  |
| F1E8  | VH3-09*01 | D6-13*01 | JH3*02 | 0              | A K D T G S S W Y R G<br>G A F D I               | 48          | VK3-20*01 | JK4*01 | 1              | Q Q Y G S S P L T            | 27          | N   | N            |  |
| F1F1  | VH4-59*01 | D3-22*01 | JH4*02 | 0              | A R G D S S G Y Y I G<br>R F Y D Y               | 48          | VK1-5*03  | JK1*01 | 0              | Q Q Y N S Y S P W<br>T       | 30          | N   | N            |  |
| F2G12 | VH3-15*01 | D3-9*01  | JH4*02 | 0              | T T D T Q Y Y Y F D Y                            | 33          | VK3-15*01 | JK1*01 | 1              | Q Q Y N N W P P T            | 27          | N   | N            |  |

| F1G6  | VH3-09*01 | D2-8*01               | JH4*02 | 0                 | A K A P Y C T I N G V C<br>Y G F D Y           | 48             | VK3-20*01 | JK1*01 | 0                 | Q Q Y G S S P P W<br>T       | 30             | N            | N      |
|-------|-----------|-----------------------|--------|-------------------|------------------------------------------------|----------------|-----------|--------|-------------------|------------------------------|----------------|--------------|--------|
| Ig    | Heavy     |                       |        |                   |                                                |                | Light     |        |                   |                              |                | Reactivity # |        |
|       | V         | D                     | J      | mutation<br>(bp)* | CDR3(aa)                                       | length<br>(bp) | V         | J      | mutation<br>(bp)* | CDR3(aa)                     | length<br>(bp) | pep          | ds-DNA |
| F2A10 | VH3-21*01 | D1-26*01              | JH4*02 | 0                 | A R D R E P Y P H F D<br>Y                     | 36             | VK1-6*01  | JK1*01 | 0                 | L Q D Y N Y P R T            | 27             | N            | N      |
| F2C2  | VH4-04*07 | D6-13*01              | JH4*02 | 0                 | A R E G G T A A R R A F<br>D Y                 | 42             | VK1-39*01 | JK1*01 | 0                 | Q Q S Y S T P Q T            | 27             | N            | N      |
| F2C4  | VH3-30*02 | D6-13*01              | JH3*02 | 1                 | A K D C T A A A D S G A<br>F D I               | 45             | VK1-12*01 | JK1*01 | 0                 | Q Q A N S F P W T            | 27             | N            | N      |
| F2C8  | VH4-59*01 | D6-19*01              | JH3*02 | 0                 | A R E E Q W L V S R A<br>F D I                 | 42             | VK1-39*01 | JK4*01 | 0                 | Q Q S Y S T P P V<br>T       | 30             | N            | N      |
| F2C9  | VH3-30*03 | D3-22*01              | JH4*02 | 4                 | A K G L S S S G Q R G<br>Y F D Y               | 45             | VK3-20*01 | JK4*01 | 1                 | Q Q Y G S S P L T            | 27             | N            | N      |
| F2C11 | VH3-72*01 | D5-12*01              | JH3*02 | 1                 | A R A A Y E D A F D I                          | 33             | VK1-39*01 | JK1*01 | 0                 | Q Q S Y S T P W T            | 27             | N            | N      |
| F2E6  | VH3-74*01 | DIR*01                | JH3*02 | 0                 | A R V R P H G A F D I                          | 33             | VK1-33*01 | JK3*01 | 0                 | Q Q Y D N L P P F<br>T       | 30             | N            | N      |
| F2F9  | VH3-48*01 | D7-27*1 or 3<br>16*01 | JH3*02 | 9                 | A S L T Y P W E L P P S<br>D A F D I           | 51             | VK3-15*01 | JK1*01 | 2                 | Q Q Y H N W P P<br>W T       | 30             | N            | N      |
| F2F12 | VH3-07*01 | D3-10*01              | JH4*02 | 0                 | A R V G D Y Y G S G S<br>Y Y N E Y Y F D Y     | 60             | VK3-11*01 | JK3*01 | 0                 | Q Q R S N W L F T            | 27             | N            | N      |
| F2G4  | VH3-15*01 | D3-3*01               | JH6*03 | 1                 | T I D E L S R I Y Y D F<br>W S G Y S Y Y M D V | 69             | VK3-20*01 | JK4*01 | 1                 | Q Q Y G S S P L T            | 27             | N            | N      |
| F1C4  | VH4-39*01 | D6-13*01              | JH4*02 | 5                 | A R H G S W Y G N F D<br>Y                     | 36             | VL2-14*04 | JL2*01 | 3                 | C S Y A G S S T S<br>R V     | 33             | N            | N      |
| F2A2  | VH3-74*01 | D5-5*01               | JH4*02 | 0                 | A R E P A I Y F D Y                            | 30             | VL3-21*02 | JL2*01 | 0                 | Q V W D S S S D H<br>P G V V | 39             | N            | N      |
| F1F3  | VH4-61*02 | D7-27*1               | JH3*02 | 1                 | A R H W G P Y A F D I                          | 33             | VL2-14*04 | JL3*02 | 0                 | C S Y A G S S T L<br>V       | 30             | N            | N      |

\* number of mutations within V region; #, "Y" means reactive in ELISA and "N" means non-reactive in ELISA ;\$ one point mutation and 3 insert mutations

Table S2(A) Repertoire and reactivity of antibodies from IgM+Tetramer+ B cells of C9

| Ig   | Heavy       |                  |        |                |                                                |             | Light     |        |                |                              |             | Reactivity # |        |
|------|-------------|------------------|--------|----------------|------------------------------------------------|-------------|-----------|--------|----------------|------------------------------|-------------|--------------|--------|
|      | V           | D                | J      | mutation (bp)* | CDR3(aa)                                       | length (bp) | V         | J      | mutation (bp)* | CDR3(aa)                     | length (bp) | pep          | ds-DNA |
| C3   | VH4-30-2*01 | D4-17*01         | JH5*02 | 0              | A R E V L Y Y G D F N<br>W F D P               | 45          | VK1-39*01 | JK1*01 | 0              | Q Q S Y S T P R T            | 27          | Y            | Y      |
| C7   | VH3-30*04   | D6-19or<br>13*01 | JH6*03 | 0              | A R A M R A A A G K A<br>A Y Y H Y Y Y M D V   | 66          | VK3-11*01 | JK1*01 | 0              | Q Q R S N W P P<br>V         | 27          | Y            | Y      |
| E5   | VH3-30*04   | /                | JH4*02 | 0              | A R F L K S F D Y                              | 27          | VK1-5*03  | JK2*01 | 0              | Q Q Y N S Y S M Y<br>T       | 30          | Y            | Y      |
| E11  | VH3-21*01   | D6-13*01         | JH6*03 | 0              | A R D S S S W A Y Y Y<br>Y Y Y M D V           | 51          | VK1-33*01 | JK1*01 | 0              | Q Q Y D N L                  | 18          | Y            | Y      |
| G2   | VH4-39*01   | D3-3*01          | JH5*02 | 0              | A R L W F V G Y Y D F<br>W S G Y Y G N W F D P | 66          | VK3-11*01 | JK4*01 | 0              | Q Q R S N W P L T            | 27          | Y            | Y      |
| E102 | VH4-59*01   | D2-21*02         | JH4*02 | 11             | A R A P S Q G V I D Y<br>C                     | 36          | VK4-1*01  | JK1*01 | 0              | Q Q Y Y S T P R T            | 27          | Y            | Y      |
| A1   | VH1-45*02   | D3-22*01         | JH4*02 | 0              | A S L S D S S G A                              | 27          | VL2-14*04 | JL1*01 | 1              | S S Y I S S S I Y<br>V       | 30          | Y            | Y      |
| A2   | VH4-31*03   | D3-10*01         | JH4*02 | 3              | A R G D A S G I Y Y K<br>K G L D Y             | 48          | VL1-51*01 | JL2*01 | 1              | G I W D S S L S A G Q<br>G V | 39          | Y            | Y      |
| H5   | VH1-02*02   | D3-3*01          | JH4*02 | 0              | A R A E V Y Y D F W S<br>G Y Y Y Y F D Y       | 57          | VK1-39*01 | JK2*01 | 0              | Q Q S Y S T P Y T            | 27          | N            | Y      |
| C11  | VH4-31*03   | D6-19*01         | JH1*01 | 15             | A R D P D Q G I G V A<br>G P L G H             | 48          | VK1-5*03  | JK2*01 | 6              | Q Q Y I S F S G Y<br>T       | 30          | Y            | N      |
| A5   | VH1-02*02   | D6-6*01          | JH4*02 | 0              | A R E G G G L G A A I<br>D Y                   | 39          | VK1-39*01 | JK3*01 | 0              | Q Q S Y S I P L F<br>T       | 30          | Y            | N      |
| A12  | VH3-30*04   | D6-19*01         | JH6*03 | 0              | A R G D S G W Y Y Y Y<br>Y M D V               | 45          | VK3-20*01 | JK2*01 | 1              | Q Q Y G S S P Y T            | 27          | Y            | N      |
| F12  | VH3-23*01   | D3-3*01          | JH4*02 | 0              | A K D R L V D F W S G<br>Y Y S S F D Y         | 54          | VL2-11*01 | JL2*01 | 0              | C S Y A G S Y I V<br>V       | 30          | Y            | N      |
| E12  | VH3-30*03   | D3-9*01          | JH4*02 | 0              | A K D L G R Y F D W F<br>P S W Y F D Y         | 54          | VL2-14*01 | JL1*01 | 1              | S S Y I S S S I L<br>G V     | 33          | Y            | N      |
| E101 | VH4-39*06   | D5-5*01          | JH4*02 | 1              | A R D H V D I A M V S<br>D Y                   | 39          | VK4-1*01  | JK1*01 | 0              | Q Q Y Y S T P R T            | 27          | Y            | N      |

|     |           |                  |        |                   |                                        |                |            |        |                   |                          |                |     |                         |  |
|-----|-----------|------------------|--------|-------------------|----------------------------------------|----------------|------------|--------|-------------------|--------------------------|----------------|-----|-------------------------|--|
| A3  | VH3-21*01 | D6-13*01         | JH4*02 | 0                 | A S L R S V G T A A A N<br>Y F D Y     | 48             | VK1-39*01  | JK3*01 | 0                 | Q Q S Y S T S L F<br>T   | 30             | N   | N                       |  |
| D1  | VH3-48*03 | D3-10 or 22      | JH4*02 | 1                 | A R V L L P D Y                        | 24             | VK1-39*01  | JK1*01 | 0                 | Q Q S Y S T A W T        | 27             | N   | N                       |  |
|     | Heavy     |                  |        |                   |                                        |                | Light      |        |                   |                          |                |     | Reactivity <sup>#</sup> |  |
| Ig  | V         | D                | J      | mutation<br>(bp)* | CDR3(aa)                               | length<br>(bp) | V          | J      | mutation<br>(bp)* | CDR3(aa)                 | length<br>(bp) | pep | ds-DNA                  |  |
| D5  | VH3-30*04 | D3-3*01 or<br>02 | JH4*02 | 0                 | A R G E D F W S G Y L<br>D Y           | 39             | VK1-NL1*01 | JK2*01 | 0                 | Q Q Y Y S T P N T        | 27             | N   | N                       |  |
| D9  | VH3-66*01 | D2-21*01         | JH4*02 | 0                 | A S R R L W G V E D Y                  | 33             | VK2-28*01  | JK4*01 | 1                 | M Q A L Q T P L T        | 27             | N   | N                       |  |
| E6  | VH3-13*01 | D2-21*01         | JH3*02 | 0                 | A R G G E G D A Y A F<br>D I           | 39             | VK1-33*01  | JK3*01 | 0                 | Q Q Y D N L P            | 21             | N   | N                       |  |
| F11 | VH3-11*01 | D6-19*01         | JH3*02 | 4                 | A R F A E V G T A V T G<br>A D A F D I | 54             | VK1-39*01  | JK2*01 | 0                 | Q Q S Y N T P Y T        | 27             | N   | N                       |  |
| G1  | VH3-30*04 | D5-12*01         | JH4*02 | 0                 | A R V S G Y D K D Y                    | 30             | VK3-11*01  | JK2*01 | 0                 | Q Q R S N W Y T          | 24             | N   | N                       |  |
| H3  | VH3-30*03 | D6-19*01         | JH3*02 | 3                 | A K E R V A V A G S D<br>A F D I       | 45             | VK1-33*01  | JK3*01 | 2                 | Q Q Y D N L P D T        | 27             | N   | N                       |  |
| A8  | VH1-18*01 | D6-13*01         | JH4*02 | 0                 | A R I S F T S S G V Y                  | 33             | VL1-44*01  | JL3*02 | 0                 | A A W D D S L N G<br>P V | 33             | N   | N                       |  |
| B11 | VH4-59*01 | D5-5*01          | JH4*02 | 2                 | A R Y V D T A M V D Y                  | 33             | VL2-14*01  | JL1*01 | 0                 | S S Y I S S S I L<br>G V | 33             | N   | N                       |  |
| E8  | VH3-23*01 | D6-19*01         | JH4*02 | 1                 | A K I E D H S S G L I F<br>D Y         | 42             | VL2-14*04  | JL3*02 | 1                 | S S Y I S S S I W<br>V   | 30             | N   | N                       |  |
| B6  | VH1-02*02 | D3-16*02         | JH4*02 | 0                 | A R D M A N L W D Y V<br>W G S Y R Y   | 51             | VL1-51*01  | JL3*02 | 0                 | G I W D S S L S A<br>G V | 33             | N   | N                       |  |

Table S2(B) Repertoire and reactivity of antibodies from IgM+Tetramer- B cells of C9

| Ig  | Heavy     |                    |        |                |                                                  |             | Light     |        |                |                          |             | Reactivity <sup>#</sup> |        |
|-----|-----------|--------------------|--------|----------------|--------------------------------------------------|-------------|-----------|--------|----------------|--------------------------|-------------|-------------------------|--------|
|     | V         | D                  | J      | mutation (bp)* | CDR3(aa)                                         | length (bp) | V         | J      | mutation (bp)* | CDR3(aa)                 | length (bp) | pep                     | ds-DNA |
| E9  | VH3-11*01 | DIR*01 and D3-3*01 | JH3*02 | 0              | A R D W G R K L R L L<br>D I                     | 39          | VK3-20*01 | JK2*01 | 0              | Q Q Y G S S P Y T        | 27          | Y                       | Y      |
| C10 | VH1-02*02 | D3-3*01            | JH4*02 | 0              | A R D L L T I F G A V P<br>Y Y F D Y             | 51          | VK3-11*01 | JK4*01 | 1              | Q Q R S N W P L A<br>L T | 33          | Y                       | Y      |
| A10 | VH3-23*01 | D2-2*01            | JH4*02 | 16             | A K G N R K Y C S S S<br>S C Y E F D S           | 54          | VL2-14*01 | JL1*01 | 3              | N S Y T I S S T C<br>V   | 30          | Y                       | N      |
| B2  | VH4-04*07 | D6-19*01           | JH4*02 | 12             | V R E G Q A V A G R G<br>F D Y                   | 42          | VK1-39*01 | JK1*01 | 4              | Q Q S Y T T P R T        | 27          | N                       | N      |
| B4  | VH3-11*01 | D2-2*01            | JH5*02 | 0              | A R G A V V V P A A I P<br>G W F D P             | 51          | VK3-15*01 | JK1*01 | 0              | Q Q Y N N W W T          | 24          | N                       | N      |
| B10 | VH3-15*01 | D1-20*01           | JH4*02 | 1              | I P P A L T I G I L G G<br>D Y                   | 42          | VK2-30*01 | JK2*01 | 1              | M Q G T H W P P S        | 27          | N                       | N      |
| C5  | VH1-18*01 | D6-13*01           | JH5*02 | 0              | A R D S S S W Y N W F<br>D P                     | 39          | VK3-11*01 | JK4*01 | 0              | Q Q R S N W L T          | 24          | N                       | N      |
| C6  | VH4-04*07 | D2-21*01           | JH4*02 | 31             | A R E G G G I R E L D F<br>A R G D S S D Y Y A Y | 36          | VK3-20*01 | JK1*01 | 14             | H Q Y E G S P Q T        | 27          | N                       | N      |
| F1  | VH4-59*01 | D3-22*01           | JH4*02 | 14             | D Y                                              | 39          | VK1-39*01 | JK2*01 | 5              | Q Q S Y S T P Y T        | 27          | N                       | N      |
| F2  | VH3-11*01 | D5-24*01           | JH3*02 | 1              | A G G R D G Y K S A F<br>D I                     | 39          | VK3-20*01 | JK1*01 | 0              | Q Q Y G S S P R T        | 27          | N                       | N      |
| G9  | VH1-18*01 | D2-15*01           | JH3*02 | 11             | A R D I V V V P I A I L<br>H A L D M             | 51          | VK1-39*01 | JK4*01 | 3              | Q Q S Y T I P R S<br>Q T | 33          | N                       | N      |
| D1  | VH3-53*01 | D1-1*01            | JH4*02 | 3              | A K A E P T A V                                  | 24          | VK1-5*03  | JK2*01 | 3              | Q Q Y N I Y P Y T        | 27          | N                       | N      |
| E5  | VH4-39*01 | D6-13*01           | JH4*02 | 0              | A R L A A A G Y F D Y                            | 36          | VK3-15*01 | JK2*01 | 2              | Q Q Y N N W P L Y<br>T   | 30          | N                       | N      |
| F5  | VH3-43*01 | D6-6*01            | JH4*02 | 9              | A K D I S S I A G R H F<br>D S                   | 42          | VK3-11*01 | JK4*01 | 5              | Q Q R S N W P P L<br>T   | 30          | N                       | N      |
| A5  | VH4-59*01 | D4-4*01            | JH6*02 | 2              | A R H M I I V I Y Y Y Y<br>Y Y G M D V           | 54          | VL1-51*01 | JL2*01 | 0              | G I W D S S L S A<br>V V | 33          | N                       | N      |

| B12 | VH4-59*01       | D6-6*01R  | JH6*02 | 0                 | A R D S G K R G R P R<br>M D V     | 42             | VL3-21*03 | JL2*01 | 1                 | Q V W D S S S D<br>S V V   | 33             | N   | N                       |  |
|-----|-----------------|-----------|--------|-------------------|------------------------------------|----------------|-----------|--------|-------------------|----------------------------|----------------|-----|-------------------------|--|
|     | Heavy           |           |        |                   |                                    |                | Light     |        |                   |                            |                |     | Reactivity <sup>#</sup> |  |
| Ig  | V               | D         | J      | mutation<br>(bp)* | CDR3(aa)                           | length<br>(bp) | V         | J      | mutation<br>(bp)* | CDR3(aa)                   | length<br>(bp) | pep | ds-DNA                  |  |
| C12 | VH3-21*01       | D6-19*01  | JH4*02 | 0                 | A S H G G L I G S G S I<br>D Y     | 42             | VL1-44*01 | JL3*02 | 1                 | A A W D D S L N G<br>W V   | 33             | N   | N                       |  |
| G2  | VH3-30*04       | D5-5*01   | JH3*01 | 6                 | A R G H I Q L W L D D<br>M D V     | 42             | VL1-51*01 | JL2*01 | 1                 | G I W D S S L S A<br>G V   | 33             | N   | N                       |  |
| G6  | VH3-23*01       | D1-1*01   | JH4*02 | 0                 | A K D P Q Y N W N D G<br>L V F D Y | 48             | VL1-40*01 | JL3*02 | 4                 | Q S Y D S S L S G<br>W V   | 33             | N   | N                       |  |
| H4  | VH3-07*01       | D5-12*01  | JH6*03 | 3                 | A R G G A I Y S A Y M<br>D V       | 39             | VL1-47*01 | JL3*02 | 1                 | A A W D D S L S G<br>Q V   | 33             | N   | N                       |  |
| C2  | VH1-08*01       | D6-13*01  | JH3*02 | 1                 | A R G C S S W E G D A<br>F D I     | 42             | VL1-44*01 | JL3*02 | 0                 | A A W D D S L N G<br>R V   | 33             | N   | N                       |  |
| D3  | VH3-30-<br>3*01 | D6-13*01  | JH4*02 | 0                 | A R A F H S S S H Y F D<br>Y       | 39             | VL2-14*01 | JL3*02 | 2                 | S S Y I S S S P W<br>V     | 30             | N   | N                       |  |
| G22 | VH3-30*03       | D6-19*01R | JH4*02 | 5                 | A K D S D A V I S L W<br>Y F D C   | 45             | VL1-51*01 | JL2*01 | 4                 | G I W D S S L S V<br>V V   | 33             | N   | N                       |  |
| E1  | VH3-48*03       | D5-12*01  | JH3*02 | 1                 | A R D P I R W L R D V<br>G A F D I | 48             | VL2-23*01 | JL3*02 | 0                 | C S Y A G S S I L<br>N W V | 36             | N   | N                       |  |

Table S3(A) Repertoire and reactivity of antibodies from IgM+Tetramer+ B cells of C15

| Ig  | Heavy           |                     |        |                |                            |             | Light     |        |                |                        |             | Reactivity <sup>#</sup> |        |
|-----|-----------------|---------------------|--------|----------------|----------------------------|-------------|-----------|--------|----------------|------------------------|-------------|-------------------------|--------|
|     | V               | D                   | J      | mutation (bp)* | CDR3(aa)                   | length (bp) | V         | J      | mutation (bp)* | CDR3(aa)               | length (bp) | pep                     | ds-DNA |
| E2  | VH3-23*01       | D6-13*01            | JH4*02 | 0              | ARGYSSSSWYRGS<br>YFDY      | 48          | VK3-15*01 | JK1*01 | 1              | QQYNNWPP<br>WT         | 30          | Y                       | Y      |
| E3  | VH4-30-<br>2*01 | D3-3*01             | JH5*02 | 0              | ARGRAIFGVDP<br>AREGNWNYQEY | 33          | VK1-5*03  | JK1*01 | 0              | QQYNSYSGT<br>QQYNNWPPR | 27          | Y                       | Y      |
| H6  | VH3-23*01       | D1-7*01             | JH2*01 | 0              | WYFDL                      | 48          | VK3-15*01 | JK1*01 | 0              | A                      | 30          | Y                       | Y      |
| E7  | VH3-49*01       | D1-7*01             | JH6*03 | 4              | IRASIGTIWRTY<br>YYYYMDV    | 57          | VK1-39*01 | JK1*01 | 0              | QQSYSTPW               | 27          | Y                       | Y      |
| D8  | VH4-39*06       | D3-22*01            | JH4*02 | 1              | IRGRRGYYS<br>GYFDY         | 48          | VK1-39*01 | JK2*01 | 1              | QQSYSTPYT              | 27          | Y                       | Y      |
| E8  | VH4-59*01       | D3-22*01            | JH2*01 | 4              | ARVTGTITILL                | 33          | VK1-39*01 | JK1*01 | 0              | QQSYSTPW<br>QYNNWPPMY  | 27          | Y                       | Y      |
| D9  | VH4-31*03       | DIR2*01             | JH3*02 | 0              | ARISIRVFDI<br>ARDLRIPIRYNW | 30          | VK3-15*01 | JK2*01 | 0              | T                      | 33          | Y                       | Y      |
| G11 | VH1-02*02       | D1-7*01             | JH4*02 | 0              | NYGFNVLDY<br>ARDMANLWDYV   | 63          | VK1-27*01 | JK5*01 | 0              | QKYN SAPFT             | 27          | Y                       | Y      |
| D12 | VH1-02*02       | D3-16*02            | JH4*02 | 0              | WGSYRY<br>ARQQWLGGWYF      | 51          | VK1-39*01 | JK4*01 | 0              | QQSYSTPLT              | 27          | Y                       | Y      |
| G9  | VH4-59*01       | D6-19*01            | JH2*01 | 5              | DL<br>PWVRGYSSRYW          | 39          | VK1-9*01  | JK4*01 | 0              | QQLNSYPPT<br>QQYDNLPIF | 27          | Y                       | Y      |
| B6  | VH5-51*01       | D5-5*01 or<br>18*01 | JH2*01 | 0              | YFDL                       | 45          | VK1-33*01 | JK3*01 | 0              | T                      | 30          | Y                       | Y      |
| B2  | VH4-59*01       | D2-21*02            | JH2*01 | 1              | GDRYWYFDL                  | 27          | VK1-39*01 | JK1*01 | 0              | QQSYSTPW               | 27          | Y                       | Y      |
| C1  | VH3-23*01       | D3-3*02R            | JH4*02 | 1              | ILQGLLDY                   | 24          | VK2-28*01 | JK1*01 | 0              | MQALQTRT               | 24          | Y                       | Y      |
| E1  | VH3-48*01       | D3-9*01             | JH4*02 | 1              | DKAGRYFDWLS<br>SFDY        | 45          | VK1-9*01  | JK5*01 | 1              | QQLNSPIT<br>AAWDDSLSG  | 24          | Y                       | Y      |
| G4  | VH3-30*01       | D3-10*01            | JH6*03 | 0              | ARDGNFYGS<br>YPAYYYYYYMD   | 69          | VL1-47*01 | JL3*02 | 0              | WV                     | 33          | Y                       | Y      |

| A8    | VH3-23*01 | D3-9*01    | JH3*02 | 0                 | A K G G R G L R Y F D<br>W A W R A F D I | 57             | VL2-14*01 | JL3*02   | 0                 | S S Y I S S S I L<br>V     | 30             | Y                       | Y      |
|-------|-----------|------------|--------|-------------------|------------------------------------------|----------------|-----------|----------|-------------------|----------------------------|----------------|-------------------------|--------|
| Ig    | Heavy     |            |        |                   |                                          |                | Light     |          |                   |                            |                | Reactivity <sup>#</sup> |        |
|       | V         | D          | J      | mutation<br>(bp)* | CDR3(aa)                                 | length<br>(bp) | V         | J        | mutation<br>(bp)* | CDR3(aa)                   | length<br>(bp) | pep                     | ds-DNA |
| F9    | VH4-59*01 |            | JH4*02 | 14                | Q G G L Y S A Y A H F<br>D Y             | 39             | VK1-39*01 | JK2*01   | 3                 | Q Q S Y S T L Y T          | 27             | Y                       | N      |
| H8    | VH3-72*01 | D1-1*01    | JH6*03 | 0                 | V L L Q L E L L H Y Y Y<br>Y M D V       | 48             | VK1-39*01 | JK1*01   | 0                 | Q Q S Y S T P W T          | 27             | Y                       | N      |
| C6    | VH4-59*01 | D1-26*01   | JH3*02 | 5                 | C L W E L L G A R C A<br>F D I           | 42             | VL1-47*01 | JL3*02   | 1                 | A A W D D S L S G<br>Q V   | 33             | Y                       | N      |
| E4    | VH3-72*01 | D2-2*01-03 | JH5*02 | 2                 | S S T G W V D W F D P                    | 33             | VL2-14*01 | JL3*02   | 17                | S S Y I N S N I W<br>L     | 30             | Y                       | N      |
| E8(2) | VH4-59*01 | D3-22*01   | JH2*01 | 4                 | V T G T I T I L L                        | 27             | VL2-14*01 | JL2/3*01 | 1                 | S S Y I S S S I V<br>V     | 30             | Y                       | N      |
| D4    | VH1-02*02 | D6-19*01   | JH6*03 | 0                 | D L P Y S S G W N Y Y<br>Y Y M D V       | 48             | VL2-11*01 | JL1*01   | 0                 | C S Y A G S Y I F<br>Y V   | 33             | Y                       | N      |
| A6    | VH4-59*01 | DIR2*01    | JH6*03 | 6                 | G V E S F Y Y Y Y Y M<br>D V             | 39             | VK3-15*01 | JK4*01   | 0                 | Q Q Y N N W P P S<br>L T   | 33             | N                       | N      |
| A11   | VH3-74*01 | D1-26*01   | JH4*02 | 0                 | V P H N K W E L S P A<br>P F D Y         | 45             | VK3-20*01 | JK4*01   | 0                 | Q Q Y G S S P G<br>G L T   | 33             | N                       | N      |
| E5    | VH3-07*01 | D3-10*02   | JH4*03 | 0                 | D Q L S Y F D Y                          | 24             | VK1-5*03  | JK1*01   | 0                 | Q Q Y N S F W T            | 24             | N                       | N      |
| H4    | VH3-21*01 | D3-22*01   | JH3*02 | 1                 | F G G I Y Y Y D S S G<br>S E P T A F D I | 57             | VK3-11*01 | JK1*01   | 0                 | Q Q R S N W P L<br>W T     | 30             | N                       | N      |
| H7    | VH3-09*01 | D3-22*01   | JH4*02 | 0                 | S G F I Y Y Y D S S G<br>Y Y Y Y F D Y   | 54             | VL1-40*01 | JL3*02   | 0                 | Q S Y D S S L S G<br>W G V | 36             | N                       | N      |

Table S3(B) Repertoire and reactivity of antibodies from IgM+Tetramer- B cells of C15

| Ig  | Heavy     |                 |        |                |                                              |             | Light     |        |                |                          |             |     | Reactivity <sup>#</sup> |  |
|-----|-----------|-----------------|--------|----------------|----------------------------------------------|-------------|-----------|--------|----------------|--------------------------|-------------|-----|-------------------------|--|
|     | V         | D               | J      | mutation (bp)* | CDR3(aa)                                     | length (bp) | V         | J      | mutation (bp)* | CDR3(aa)                 | length (bp) | pep | ds-DNA                  |  |
| A5  | VH3-21*01 | D6-6*01         | JH4*02 | 0              | A R G Q P S S T A A R R<br>Y F D Y           | 48          | VK1-5*03  | JK1*01 | 0              | Q Q Y N S Y S P I<br>T   | 30          | Y   | Y                       |  |
| B3  | VH1-18*01 | D3-3*01         | JH1*01 | 1              | A R V P K L R F L E P F<br>Q H               | 42          | VK3-15*01 | JK1*01 | 0              | Q Q Y N N W P P K<br>T   | 30          | Y   | Y                       |  |
| D9  | VH3-23*01 | D2-2*01         | JH4*02 | 0              | A K G S T V V V P A G Y<br>F D Y             | 45          | VL1-44*01 | JL1*01 | 0              | A A W D D S L N G<br>Y V | 33          | N   | Y                       |  |
| A10 | VH3-23*01 | D6-6*01         | JH2*01 | 1              | A K V D Y R S T A A R P<br>F W Y F D L       | 54          | VK3-20*01 | JK4*01 | 1              | Q Q Y G S S P L T        | 27          | Y   | N                       |  |
| F7  | VH3-30*03 | D3-10*01        | JH4*02 | 0              | A K D N Y Y G G G D Y                        | 33          | VL2-23*02 | JL1*01 | 0              | C S Y A G S S P Y<br>V   | 30          | Y   | N                       |  |
| A7  | VH4-39*06 | D7-27*01        | JH4*02 | 3              | A R A P Q L G I R G Y Y<br>F D Y             | 45          | VK3-15*01 | JK1*01 | 0              | Q Q Y N N W P P<br>W T   | 30          | N   | N                       |  |
| B1  | VH3-33*01 | D2-15*01        | JH4*02 | 1              | A R D G G Y C S G G S<br>C Y S Y F D Y       | 54          | VK3-15*01 | JK2*01 | 0              | Q Q Y N N W P A H<br>T   | 30          | N   | N                       |  |
| B6  | VH4-39*01 | D1-26*01        | JH5*02 | 6              | A S G R G W F D P                            | 27          | VK3-20*01 | JK1*01 | 9              | Q Q Y G G S P W T        | 27          | N   | N                       |  |
| D2  | VH3-23*01 | DIR1*01/02      | JH3*02 | 4              | A K G P A P G G I                            | 27          | VK2-29*02 | JK4*01 | 0              | M Q G I H L P L T        | 27          | N   | N                       |  |
| D5  | VH1-18*01 | D1-20*01        | JH3*02 | 2              | A S P G G Y N W N D D<br>A F D I             | 45          | VK3-20*01 | JK4*01 | 0              | Q Q Y G S S L L T        | 27          | N   | N                       |  |
| D10 | VH5-51*01 | DIR1 or<br>2*01 | JH4*02 | 0              | A R Q P V A P D F D Y                        | 33          | VK3-15*01 | JK1*01 | 0              | Q Q Y N N W P R T        | 27          | N   | N                       |  |
| G1  | VH4-39*01 | D6-13*01        | JH5*02 | 0              | A R H M I L P P D L A A<br>A G T G G W F D P | 63          | VK3-11*01 | JK1*01 | 0              | Q Q R S N W P Q T        | 27          | N   | N                       |  |
| C1  | VH1-2*02  | D1-26*01        | JH3*02 | 0              | A R V R A L V G A G G F<br>D I               | 42          | VK1-33*01 | JK4*01 | 0              | Q Q Y D N L P L          | 24          | N   | N                       |  |
| B12 | VH4-34*01 | D1-26*01        | JH4*02 | 1              | A R C F I V G A I I G Y<br>D Y               | 48          | VL1-44*01 | JL3*02 | 1              | A A W D D S L N G<br>R V | 33          | N   | N                       |  |
| A4  | VH1-18*01 | D1-26*01        | JH3*02 | 0              | A R D W Y S G I R I A E<br>V H A F D I       | 54          | VL2-23*01 | JL2*01 | 0              | C S Y A G S S I V<br>V   | 30          | N   | N                       |  |

|     |                 |            |        |                   | A R A G A E T T A V A G<br>Q P Y Y           |                |           |        |                   |                              | Q S Y D S S L S G<br>P L |     |                         |   |
|-----|-----------------|------------|--------|-------------------|----------------------------------------------|----------------|-----------|--------|-------------------|------------------------------|--------------------------|-----|-------------------------|---|
| C9  | VH4-61*02       | D6-19*01   | JH4*02 | 2                 |                                              | 48             | VL1-40*01 | JL1*01 | 0                 |                              |                          | 33  | N                       | N |
| Ig  | Heavy           |            |        |                   |                                              |                | Light     |        |                   |                              |                          |     | Reactivity <sup>#</sup> |   |
|     | V               | D          | J      | mutation<br>(bp)* | CDR3(aa)                                     | length<br>(bp) | V         | J      | mutation<br>(bp)* | CDR3(aa)                     | length<br>(bp)           | pep | ds-DNA                  |   |
| D1  | VH4-39*01       | D6-13*01   | JH3*02 | 0                 | A R L E G P G R V L G A<br>F D I             | 45             | VL1-47*01 | JL3*02 | 1                 | A A W D D S L S G<br>L N W V | 39                       | N   | N                       |   |
| D8  | VH3-30-<br>3*01 | D4-17*01R  | JH6*03 | 0                 | A R G D R I V Y Y Y Y<br>Y M D V             | 45             | VL1-51*02 | JL3*02 | 0                 | G I W D S S L S A<br>W V     | 33                       | N   | N                       |   |
| E9  | VH4-39*01       | D3-22*01   | JH2*01 | 0                 | A I P R A Y Y Y D S S G<br>Y S R G G Y F D L | 63             | VL2-14*01 | JL2*01 | 1                 | S S Y I S S S P V<br>V       | 30                       | N   | N                       |   |
| E11 | VH1-18*01       | D2-2*01    | JH5*02 | 2                 | A R D P F G Y C S S T<br>S C Q G R D W F D P | 63             | VL1-44*01 | JL3*02 | 0                 | A A W D D S L N G<br>F W V   | 36                       | N   | N                       |   |
| D22 | VH3-23*01       | DIR1*01/02 | JH3*02 | 4                 | A K G P A P G G I                            | 27             | VL1-47*01 | JL3*02 | 1                 | A A W D D S L S G<br>Q V     | 33                       | N   | N                       |   |
