# Supplementary material
Source: PubMed Central journal article supplement (PMC2577778)

## V gene distribution

□ DNA+ ■ DNA-

## J gene distribution

M55

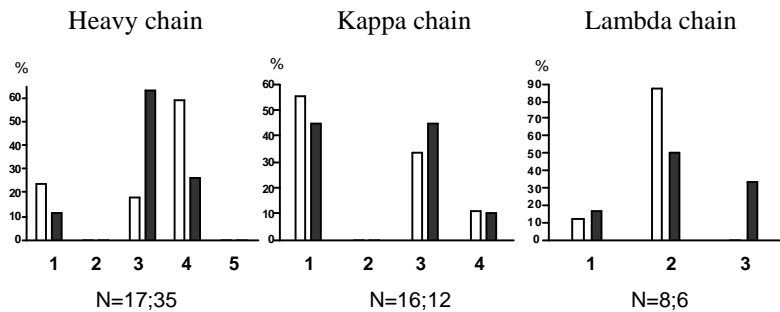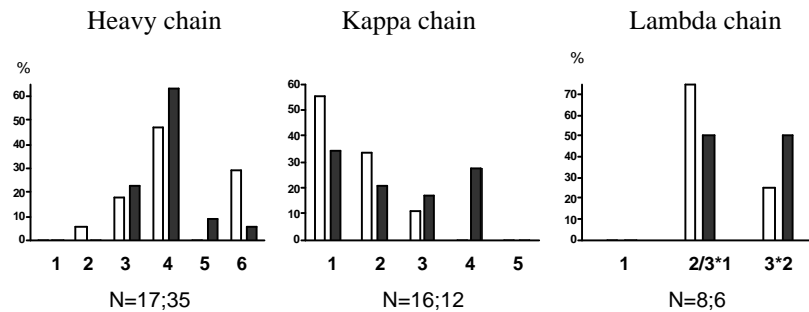

C9

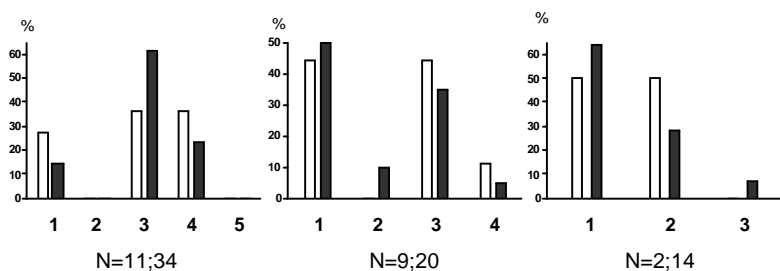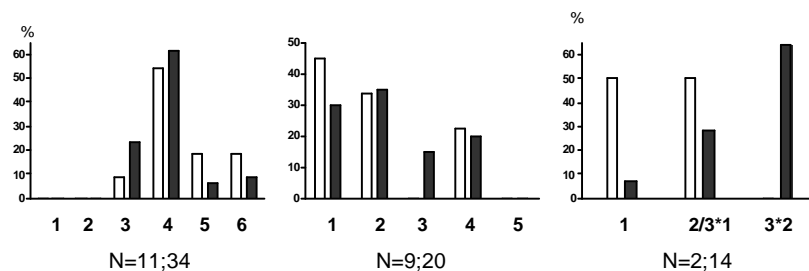

C15

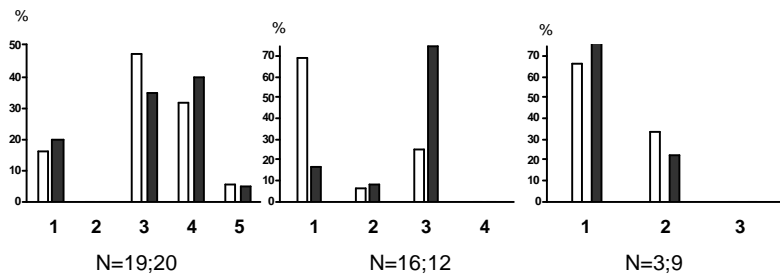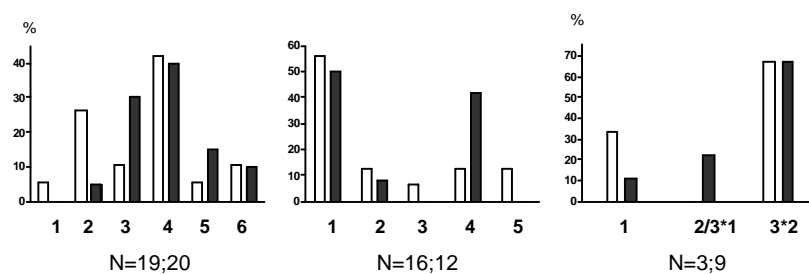

Supplement: NIHMS71143-supplement-01.pdf [file NIHMS71143-supplement-01.pdf]
